## Volume 19, 2008 Supplement 2

### ESMO Clinical Recommendations

|                                                                                                                      |      |                                                                                                                         |       |
|----------------------------------------------------------------------------------------------------------------------|------|-------------------------------------------------------------------------------------------------------------------------|-------|
| Primary breast cancer: ESMO Clinical Recommendations for diagnosis, treatment and follow-up.                         | ii7  | Hodgkin's lymphoma: ESMO Clinical Recommendations for diagnosis, treatment and follow-up.                               | ii65  |
| Locally recurrent or metastatic breast cancer: ESMO Clinical Recommendations for diagnosis, treatment and follow-up. | ii11 | Diffuse large B-cell non Hodgkin's lymphoma: ESMO Clinical Recommendations for diagnosis, treatment and follow-up.      | ii67  |
| Epithelial ovarian carcinoma: ESMO Clinical Recommendations for diagnosis, treatment and follow-up.                  | ii14 | Gastric marginal zone lymphoma of MALT type: ESMO Clinical Recommendations for diagnosis, treatment and follow-up.      | ii70  |
| Cervical cancer: ESMO Clinical Recommendations for diagnosis, treatment and follow-up.                               | ii17 | Primary cutaneous lymphoma: ESMO Clinical Recommendations for diagnosis, treatment and follow-up.                       | ii72  |
| Endometrial carcinoma: ESMO Clinical Recommendations for diagnosis, treatment and follow-up.                         | ii19 | Newly diagnosed and relapsed follicular lymphoma: ESMO Clinical Recommendations for diagnosis, treatment and follow-up. | ii77  |
| Esophageal cancer: ESMO Clinical Recommendations for diagnosis, treatment and follow-up.                             | ii21 | Squamous cell carcinoma of the head and neck: ESMO Clinical Recommendations for diagnosis, treatment and follow-up.     | ii79  |
| Gastric cancer: ESMO Clinical Recommendations for diagnosis, treatment and follow-up.                                | ii23 | Nasopharyngeal cancer: ESMO Clinical Recommendations for diagnosis, treatment and follow-up.                            | ii81  |
| Pancreatic cancer: ESMO Clinical Recommendations for diagnosis, treatment and follow-up.                             | ii25 | Malignant glioma: ESMO Clinical Recommendations for diagnosis, treatment and follow-up.                                 | ii83  |
| Hepatocellular carcinoma: ESMO Clinical Recommendations for diagnosis, treatment and follow-up.                      | ii27 | Cutaneous malignant melanoma: ESMO Clinical Recommendations for diagnosis, treatment and follow-up.                     | ii86  |
| Colon cancer: ESMO Clinical Recommendations for diagnosis, treatment and follow-up.                                  | ii29 | Soft tissue sarcomas: ESMO Clinical Recommendations for diagnosis, treatment and follow-up.                             | ii89  |
| Rectal cancer: ESMO Clinical Recommendations for diagnosis, treatment and follow-up.                                 | ii31 | Osteosarcoma: ESMO Clinical Recommendations for diagnosis, treatment and follow-up.                                     | ii94  |
| Advanced colorectal cancer: ESMO Clinical Recommendations for diagnosis, treatment and follow-up.                    | ii33 | Ewing's sarcoma of the bone: ESMO Clinical Recommendations for diagnosis, treatment and follow-up.                      | ii97  |
| Gastrointestinal stromal tumors: ESMO Clinical Recommendations for diagnosis, treatment and follow-up.               | ii35 | Differentiated thyroid cancer: ESMO Clinical Recommendations for diagnosis, treatment and follow-up.                    | ii99  |
| Non-small-cell lung cancer: ESMO Clinical Recommendations for diagnosis, treatment and follow-up.                    | ii39 | Neuroendocrine bronchial and thymic tumors: ESMO Clinical Recommendation for diagnosis, treatment and follow-up.        | ii102 |
| Small-cell lung cancer: ESMO Clinical Recommendations for diagnosis, treatment and follow-up.                        | ii41 | Neuroendocrine gastroenteropancreatic tumors: ESMO Clinical Recommendations for diagnosis, treatment and follow-up.     | ii104 |
| Malignant pleural mesothelioma: ESMO Clinical Recommendations for diagnosis, treatment and follow-up.                | ii43 | Cancers of unknown primary site: ESMO Clinical Recommendations for diagnosis, treatment and follow-up.                  | ii106 |
| Prostate cancer: ESMO Clinical Recommendations for diagnosis, treatment and follow-up.                               | ii45 | Cancer, fertility and pregnancy: ESMO Clinical Recommendations for diagnosis, treatment and follow-up.                  | ii108 |
| Invasive bladder cancer: ESMO Clinical Recommendations for diagnosis, treatment and follow-up.                       | ii47 | Chemotherapy-induced nausea and vomiting: ESMO Clinical Recommendations for prophylaxis                                 | ii110 |
| Testicular seminoma: ESMO Clinical Recommendations for diagnosis, treatment and follow-up.                           | ii49 | Erythropoietins in cancer patients: ESMO Recommendations for use.                                                       | ii113 |
| Mixed or non-seminomatous germ-cell tumors: ESMO Clinical Recommendations for diagnosis, treatment and follow-up.    | ii52 | Hematopoietic growth factors: ESMO Recommendations for the applications.                                                | ii116 |
| Multiple myeloma: ESMO Clinical Recommendations for diagnosis, treatment and follow-up.                              | ii55 | Management of cancer pain: ESMO Clinical Recommendations.                                                               | ii119 |
| Acute myeloblastic leukemia in adult patients: ESMO Clinical Recommendations for diagnosis, treatment and follow-up. | ii58 | Management of oral and gastrointestinal mucositis: ESMO Clinical Recommendations.                                       | ii122 |
| Chronic lymphocytic leukemia: ESMO Clinical Recommendations for diagnosis, treatment and follow-up.                  | ii60 | Management of venous thromboembolism in cancer patients: ESMO Clinical Recommendations.                                 | ii126 |
| Chronic myelogenous leukemia: ESMO Clinical Recommendations for diagnosis, treatment and follow-up.                  | ii63 | Disclosures                                                                                                             |       |
